# Supplementary material for: Silver⋯X–aryl (X = I and Br) interaction in a network assembly with a flexible polynuclear silver–ethynide supramolecular synthon
Source: Royal Society of Chemistry journal article supplement (doi:10.1039/b900308h), 2009-01-01
Supplement: b900308h.pdf [file b900308h.pdf]

## Supplementary Material

**Title: Silver...X–Aryl (X = I and Br) interaction in network assembly  
with a flexible polynuclear silver-ethynide supramolecular synthon**

Authours: Shuang-Quan Zang, Ping-Shing Cheng and Thomas C. W.  
Mak\*

*Department of Chemistry and Center of Novel Functional Molecules, The Chinese  
University of Hong Kong, Shatin, New Territories, Hong Kong SAR, People's  
Republic of China. Fax: +852-2603 5057; E-mail: tcwmak@cuhk.edu.hk*

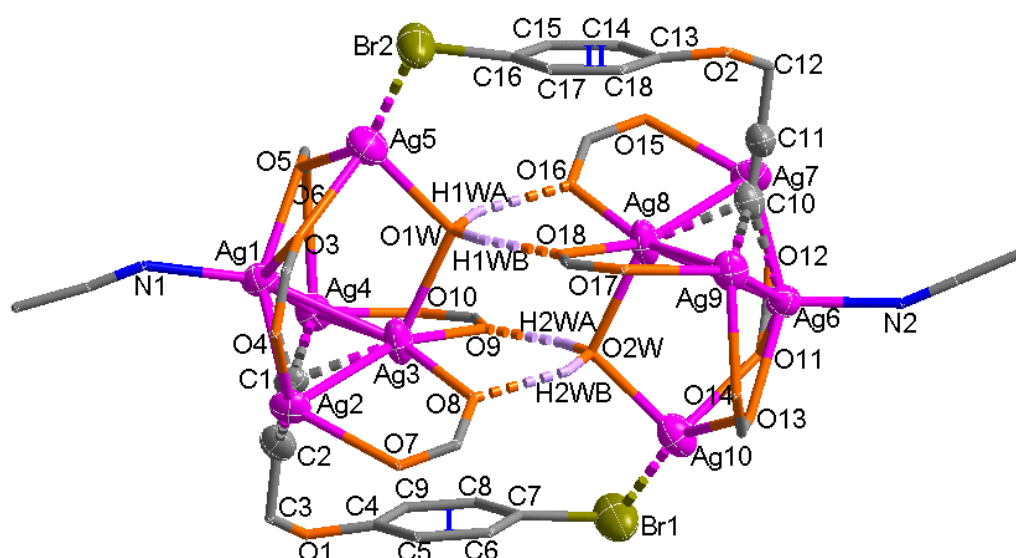

**Fig. S1** Atom labeling (50% thermal ellipsoids) and coordination mode of L2 in **4**. All irrespective hydrogen atoms, CH<sub>3</sub> groups of acetonitrile and CF<sub>3</sub> moieties of CF<sub>3</sub>CO<sub>2</sub><sup>−</sup> are omitted for clarity. Selected bond lengths [Å] can be seen in Table 1.

As shown in Fig. S1, the ethynide groups (C1≡C2) and (C10≡C11) are bound to butterfly-shaped Ag<sub>4</sub> baskets with  $\mu_4\text{-}\eta^1, \eta^1, \eta^1, \eta^2$ -mode. Such two independent Ag<sub>4</sub> baskets are glued together through strong Ag⋯Br–aryl interactions (Ag5⋯Br2 2.584 Å and Ag10⋯Br1 2.599 Å) to give a silver-organic cycle, which is stabilized by O1W⋯O16 2.820 Å, O1W⋯O17 2.765 Å, O2W⋯O8 2.824 Å and O2W⋯O9 2.746 Å hydrogen bonds.

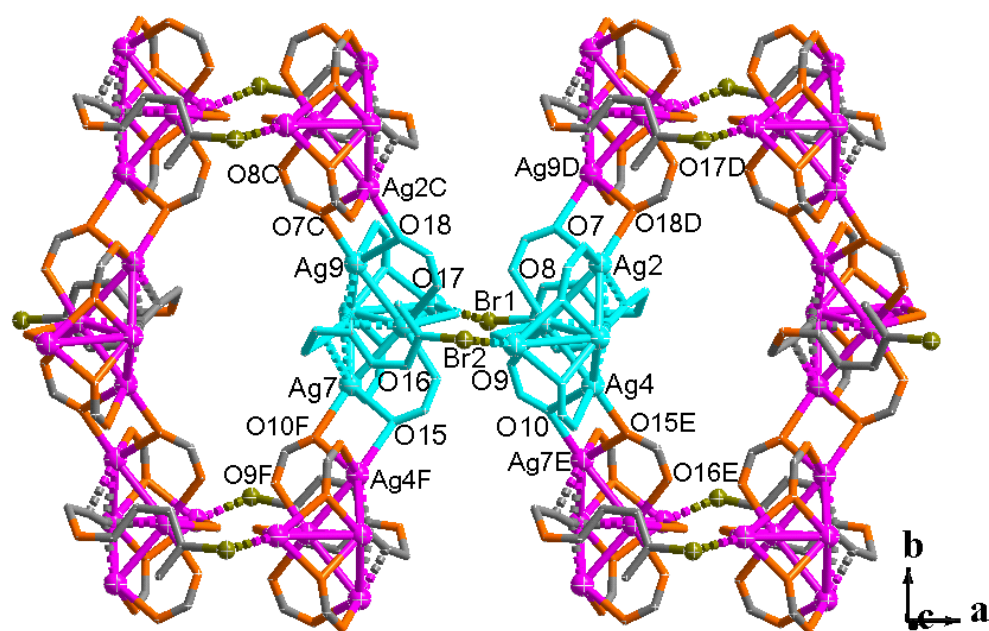

**Fig. S2** 2D metal-organic network of **4**. One segment is marked as blue. All hydrogen atoms, acetonitrile molecules and  $\text{CF}_3$  moieties of  $\text{CF}_3\text{CO}_2^-$  are omitted for clarity. All irrespective atoms are omitted for clarity. Symmetry codes: A  $-1/2 + x, 2 - y, z$ ; B  $1/2 + x, 2 - y, z$ ; C  $1/2 + x, 1 - y, z$ ; D  $-1/2 + x, 1 - y, z$ .

Such silver-organic cycles are connected together through four types of  $\mu_3$ - $O,O',O'$  trifluoroacetate groups (O7–O8, O9–O10, O15–O16 and O17–O18) to generate a 2D metal-organic network parallel to the  $ab$  plane (Fig. S2). In fact, we can also regard that two kinds of  $\text{Ag}_4$  baskets are firstly united together through the trifluoroacetate groups to give chain structure along the  $b$  axis and then two kinds of supramolecular chains as building units are further fused together through  $\text{Ag}\cdots\text{Br}$ –aryl interactions along the  $a$  axis to give a 2D metal-organic network.
